# Supplementary material for: Noncovalent fabrication and tunable fusion of block copolymer–giant polyoxometalate hybrid micelles
Source: Royal Society of Chemistry journal article supplement (doi:10.1039/c4sm01302f), 2014-01-01
Supplement: c4sm01302f1.pdf [file c4sm01302f1.pdf]

## Supporting information

### Noncovalent fabrication and tunable fusion of block copolymer-giant polyoxometalate hybrid micelles

Liying Zhang, Haolong Li\* and Lixin Wu\*

State Key Laboratory of Supramolecular Structure and Materials, College of Chemistry, Jilin University, Changchun 130012, China.

\*Corresponding author. E-mail: [hl\\_li@jlu.edu.cn](mailto:hl_li@jlu.edu.cn); [wulx@jlu.edu.cn](mailto:wulx@jlu.edu.cn)

**Table S1.** Elemental analysis results of C-Mo. The chemical formula of C-Mo is  $(\text{CDDA})_{41}(\text{NH}_4)\text{Mo}_{132}$ .

|                      | C (%) | H (%) | N (%) |
|----------------------|-------|-------|-------|
| Experimental results | 39.14 | 6.01  | 1.22  |
| Calculated value     | 38.68 | 6.42  | 1.34  |

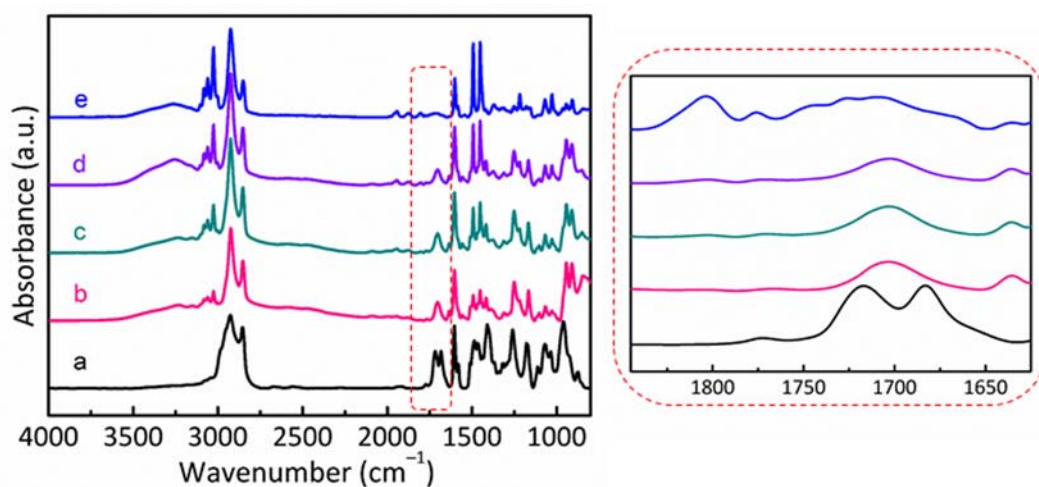

**Fig. S1** FT-IR spectra of (a) C-Mo, (b) PS.8/C-Mo, (c) PS24/C-Mo, (d) PS47/C-Mo and (e) PS310/C-Mo by casting PS-*b*-P4VP/C-Mo chloroform solution on  $\text{CaF}_2$  substrates (left) and its magnified spectra in the red column (right).

**Table S2.** DLS data of PS-*b*-P4VP/C-Mo according to Fig. 3.

|            | PS24/C-Mo | PS47/C-Mo | PS310/C-Mo |
|------------|-----------|-----------|------------|
| $D_h$ (nm) | 120       | 101       | 157        |
| PDI        | 0.233     | 0.100     | 0.057      |

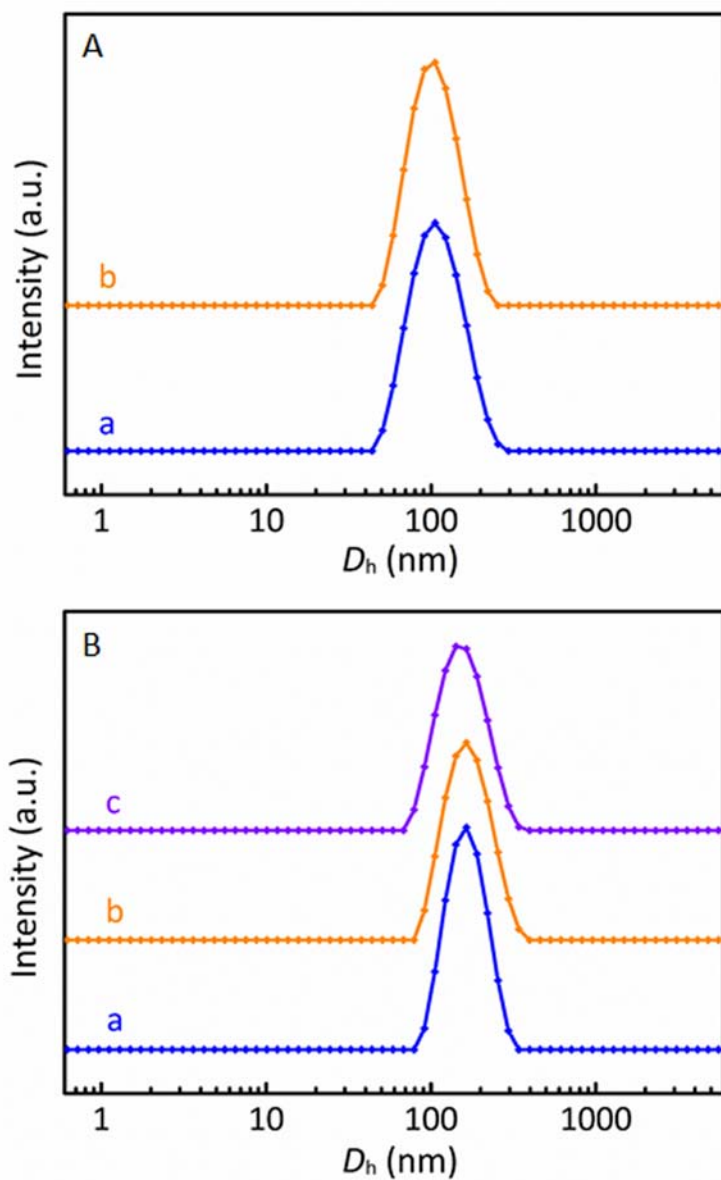

**Fig. S2** DLS diagrams of (A) PS47/C-Mo chloroform solution when the concentration is (a)  $2 \times 10^{-6}$  mol/L and (b)  $2 \times 10^{-7}$  mol/L regarding polymer part and (B) PS310/C-Mo chloroform solution when the concentration is (a)  $2 \times 10^{-6}$  mol/L, (b)  $2 \times 10^{-7}$  mol/L and (c)  $2 \times 10^{-8}$  mol/L regarding polymer part.

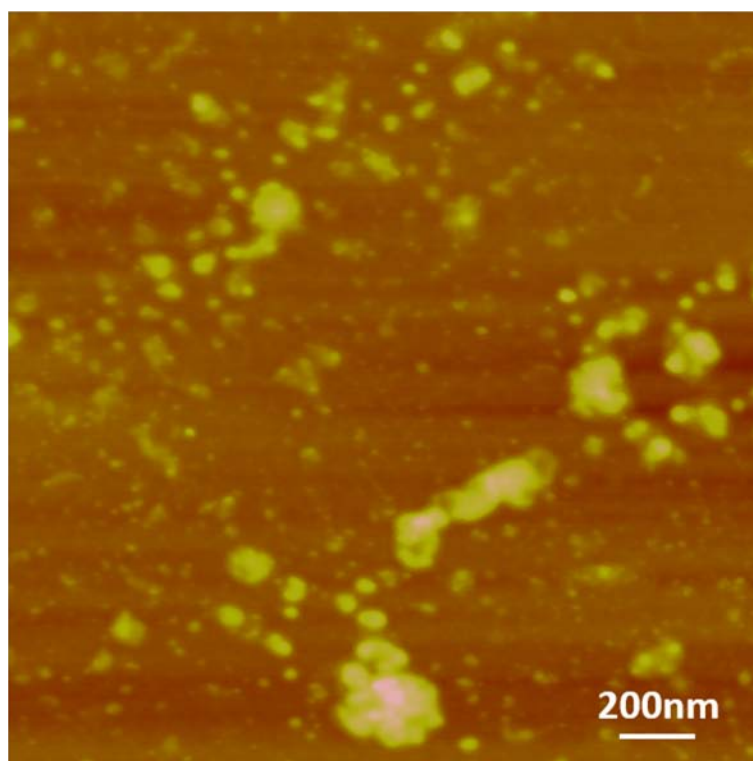

**Fig. S3** AFM height image of PS9.8/C-Mo assemblies by spin-coating its chloroform solution on Si substrate when the concentration is  $2 \times 10^{-6}$  mol/L.

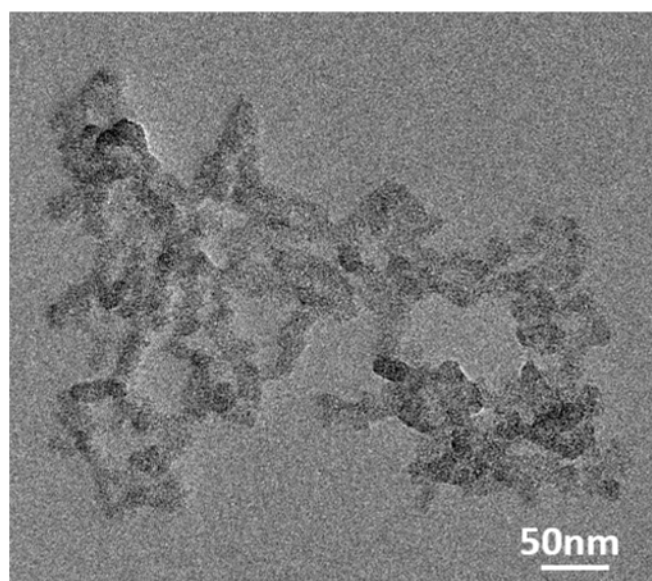

**Fig. S4** TEM image of PS9.8/C-Mo assemblies by casting its chloroform solution on carbon-coated copper grid when the concentration is  $2 \times 10^{-6}$  mol/L.

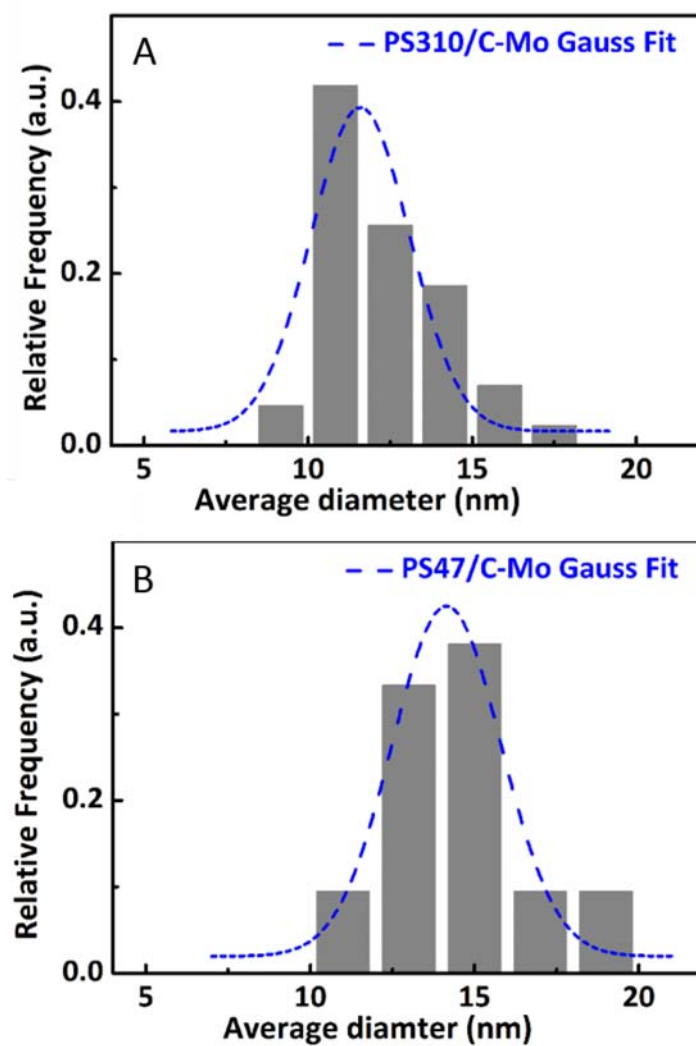

**Fig. S5** Core diameter distribution histograms and their corresponding Gaussian fits of PS310/C-Mo (A) and PS47/C-Mo (B) according to their TEM images in Fig. 5a and Fig. 5c.



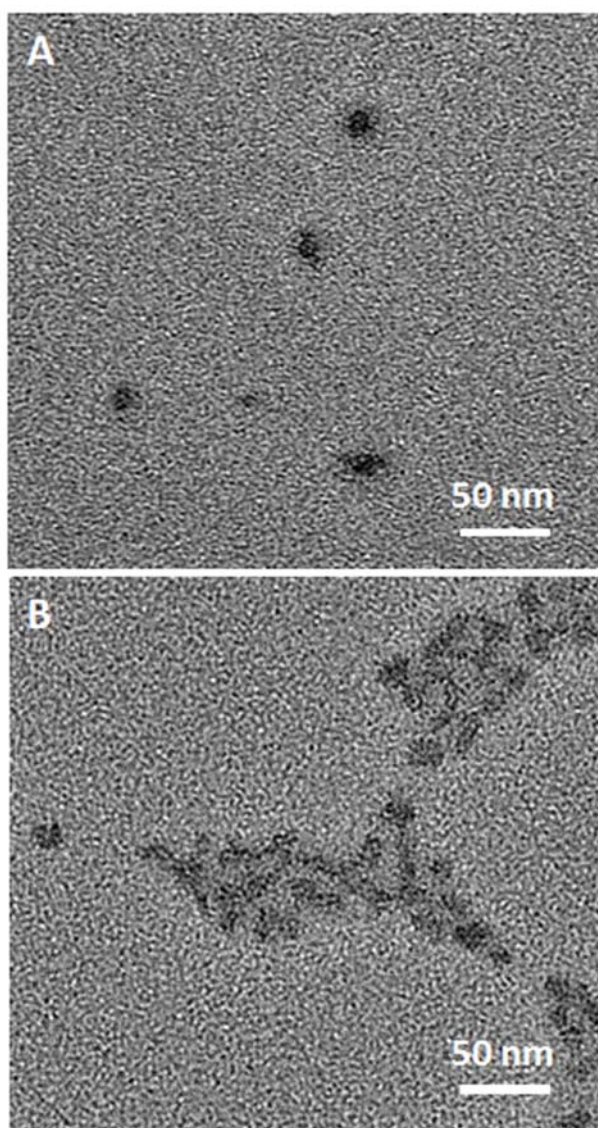

**Fig. S6** TEM images of PS47/C-Mo (A) and PS24/C-Mo (B) after RuO<sub>4</sub> staining.

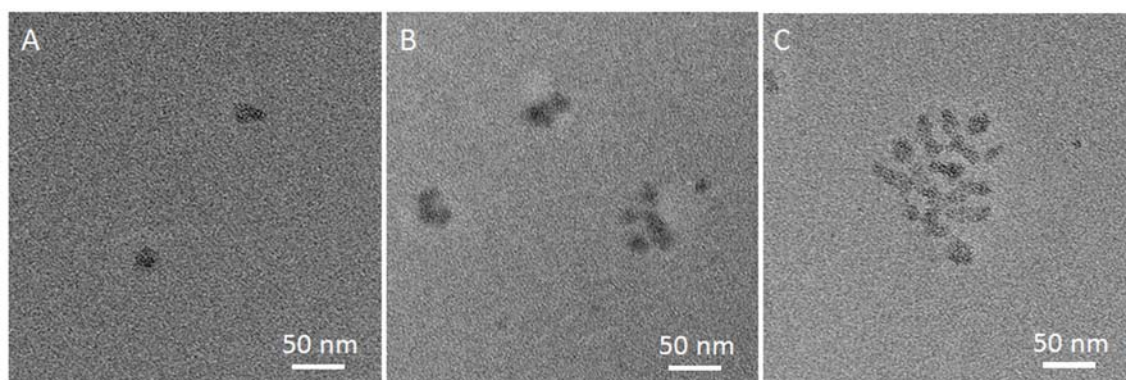

**Fig. S7** TEM images of PS24/C-Mo core-fused kinetics from initial isolated micelles (A) to fused micelles in a slightly linked state (B) and then fused micelles with a network structure (C).
